# Supplementary material for: One-pot synthesis of 2,5-diformylfuran from fructose using a magnetic bi-functional catalyst
Source: Royal Society of Chemistry journal article supplement (doi:10.1039/c6ra01549b), 2016-01-01
Supplement: c6ra01549b1.pdf [file c6ra01549b1.pdf]

**Supplementary Information**

**One-pot synthesis of 2,5-diformylfuran from fructose using a magnetic bi-functional catalyst**

Neha Mittal, Grace M. Nisola, Lenny B. Malihan, Jeong Gil Seo, Hern Kim, Seong-Poong Lee,  
Wook-Jin Chung\*

*Energy and Environment Fusion Technology Center, Department of Energy Science and  
Technology, Myongji University, Myongji-ro 116, Namdong, Cheoingu, Yongin-city, Gyeonggi-  
Do, 449-728, Republic of Korea*

---

\*Corresponding Author: Tel: +82-31-336-8471, Fax: +82-31-337-2902

E-Mail: [wjc0828@gmail.com](mailto:wjc0828@gmail.com)

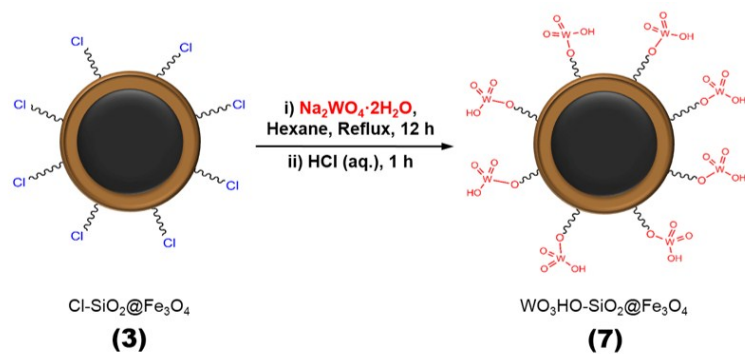

**Scheme S1.** Synthesis of mono-functional  $\text{WO}_3\text{HO-SiO}_2\text{@Fe}_3\text{O}_4$  (7) nanocatalyst.

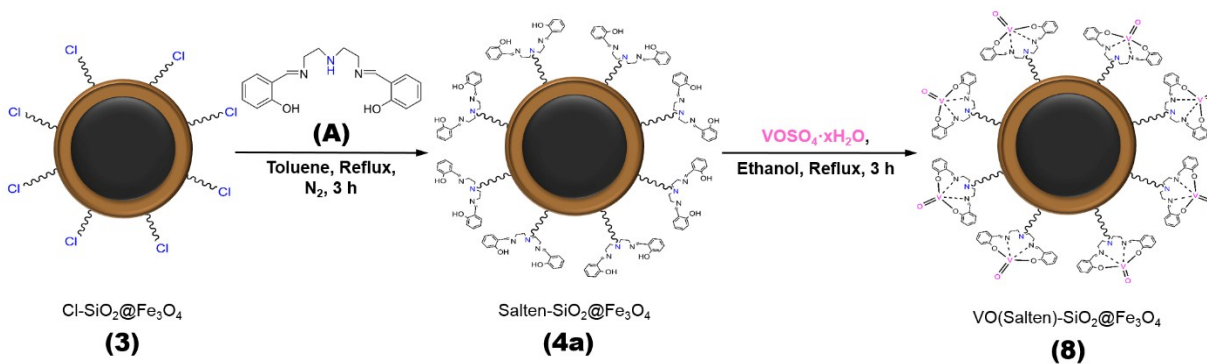

**Scheme S2.** Synthesis of mono-functional  $\text{VO(Salten)-SiO}_2\text{@Fe}_3\text{O}_4$  (8) nanocatalyst.

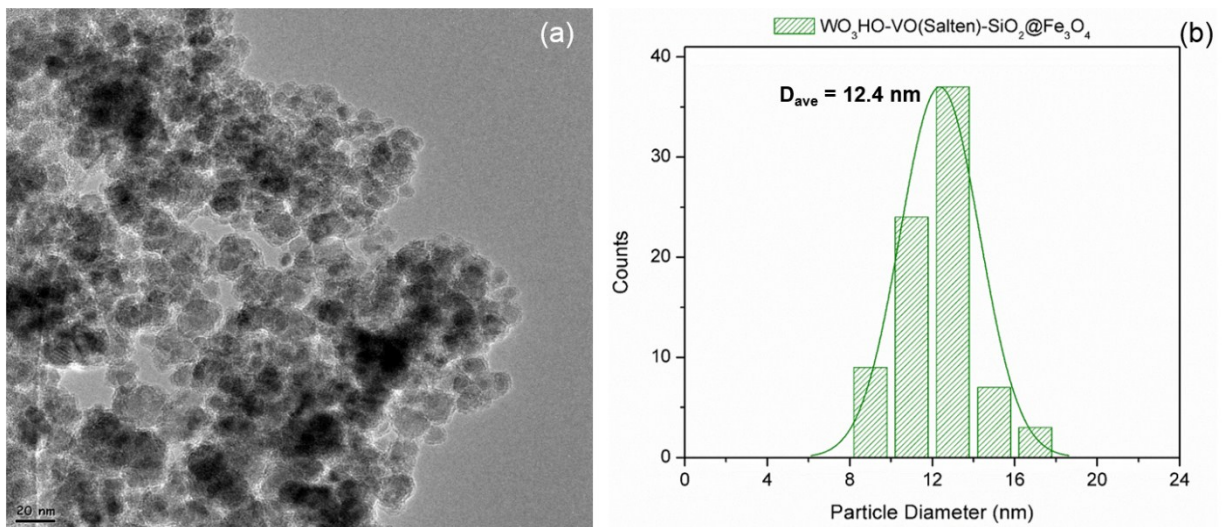

**Figure S1.** (a) TEM image of  $\text{WO}_3\text{HO-VO(Salten)-SiO}_2@Fe_3O_4$  catalyst and (b) its size distribution histogram.

DFF-purified  
Sample: DFF-purified  
Sample ID: s\_20\_DFF-purified\_1509-R1552-JWJ\_20150910\_01  
File: home/walkup2/vnmrsys/data/1509-R1552-JWJ/DFF-purified\_Proton\_01.fid  
Pulse Sequence: s2pu1  
Solvent: cdcl3  
Ambient temperature  
Sample #20, Operator: walkup2  
File: DFF-purified\_Proton\_01  
VNMR-400 "400MR"  
Relax. delay 1.000 sec  
Pulse 45.0 degrees  
Acq. time 2.049 sec  
Width 8830.6 Hz  
8 repetitions  
OBSERVE H1, 400.0340167 MHz  
DATA PROCESSING  
Line broadening 0.5 Hz  
FT size 85536  
Total time 0 min, 31 sec

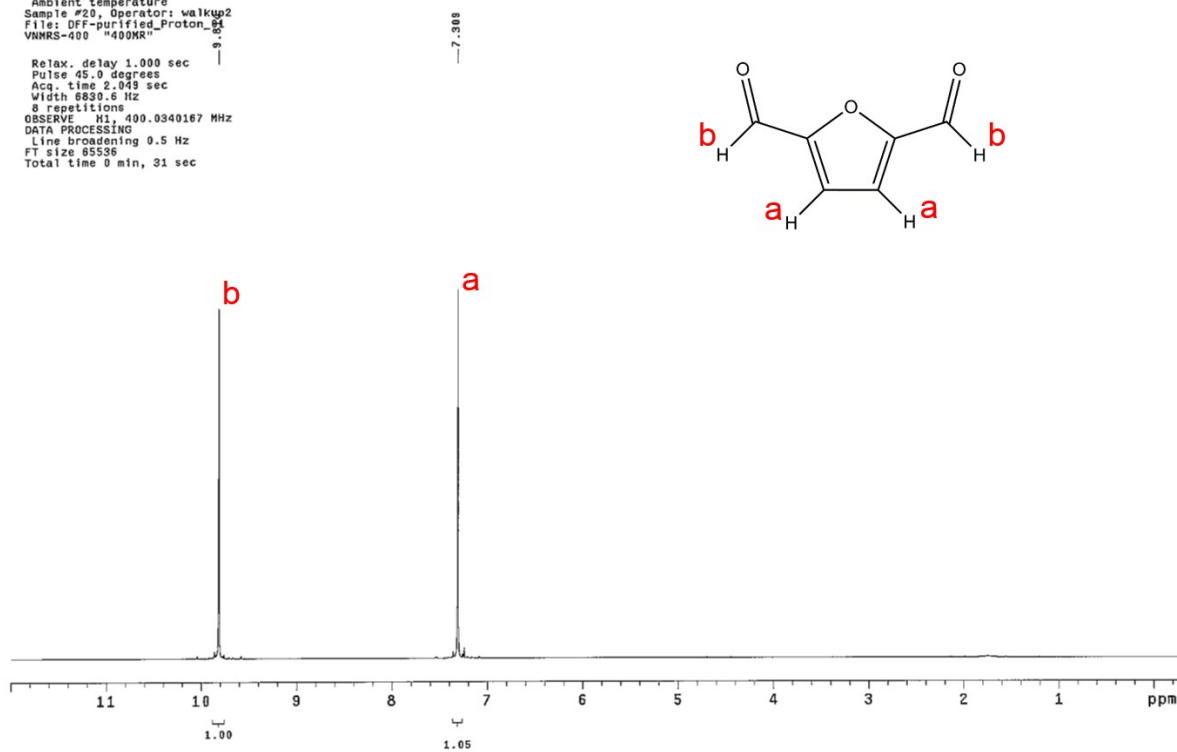

**Figure S2.**  $^1\text{H}$  NMR ( $\text{CDCl}_3$ ) of 2,5-diformylfuran (2,5-DFF).  $^1\text{H}$ -NMR ( $\text{CDCl}_3$ , 400 MHz)  $\delta$ :

7.30 (s, 2H), 9.81 (s, 2H) ppm.

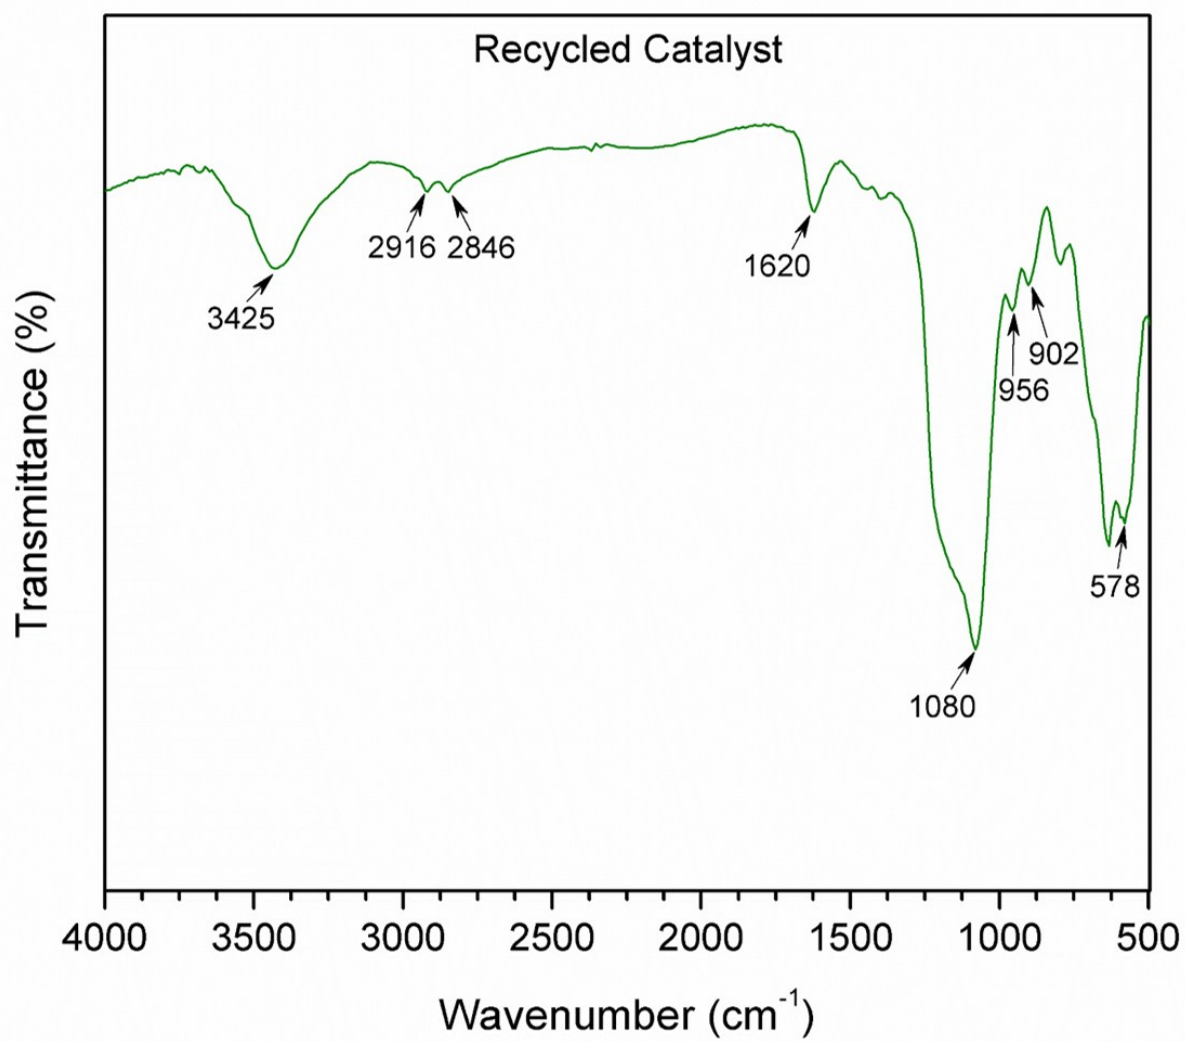

**Figure S3.** FT-IR spectrum of recycled catalyst after 5<sup>th</sup> use.
